# Supplementary material for: Uncertainty of future projections of species distributions in mountainous regions
Source: PubMed Central journal article supplement (PMC5761832; doi:10.1371/journal.pone.0189496), 2018-01-10

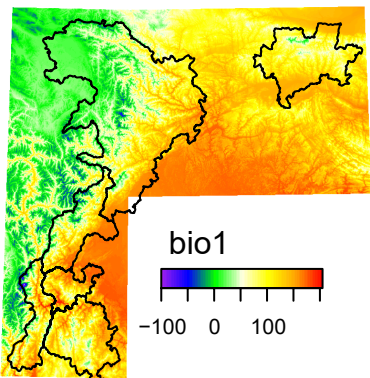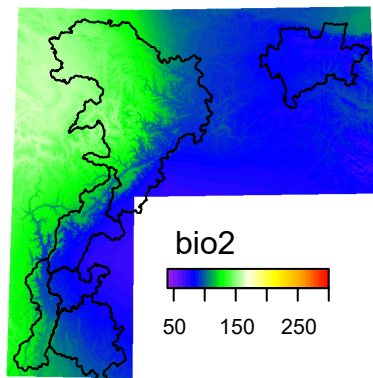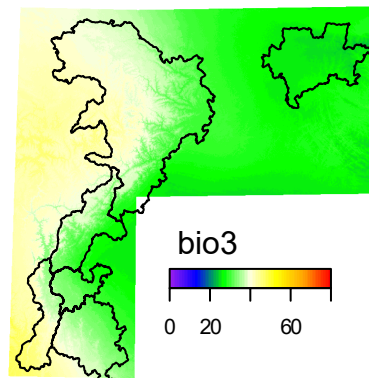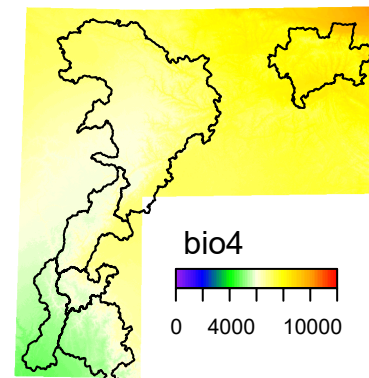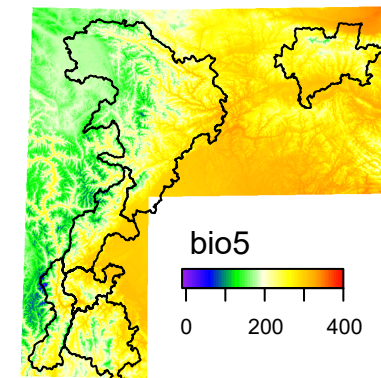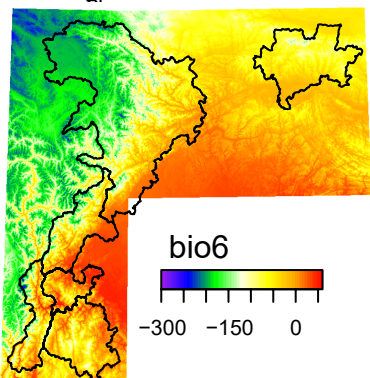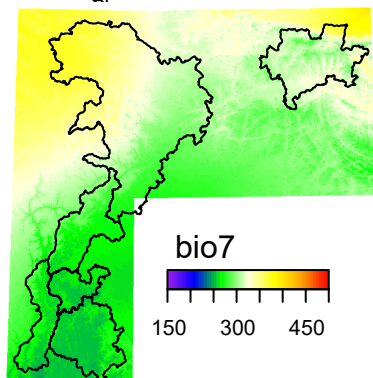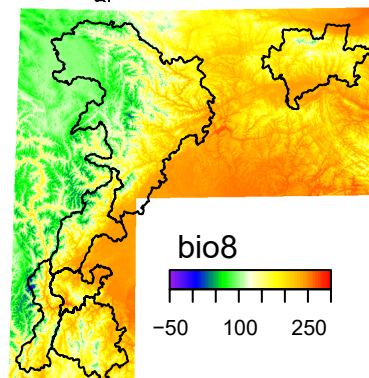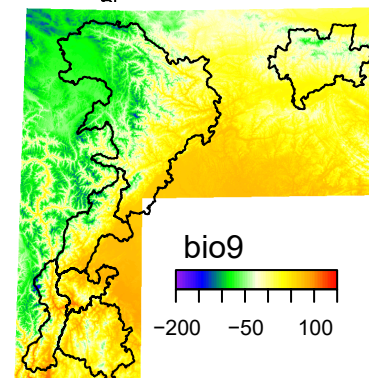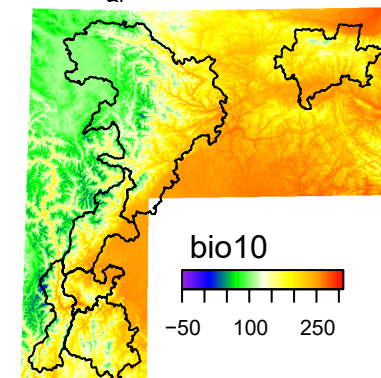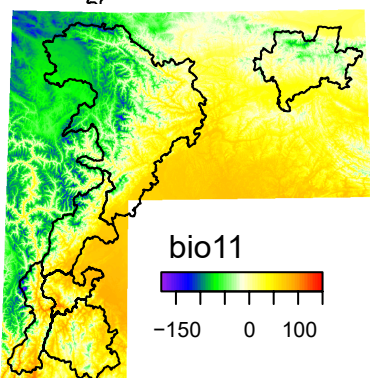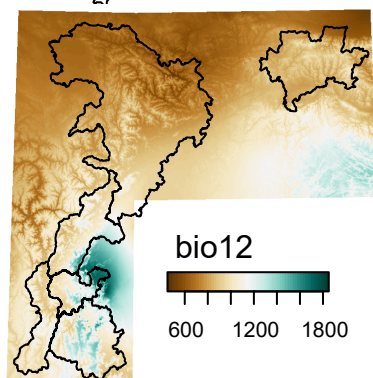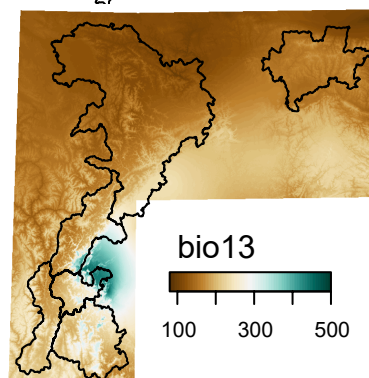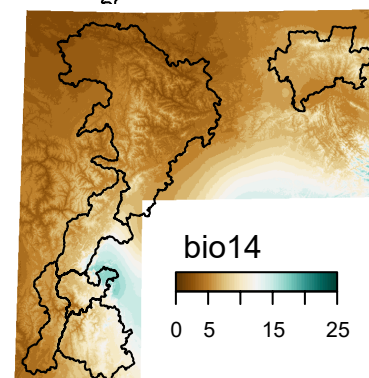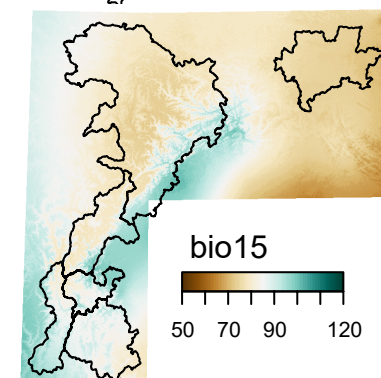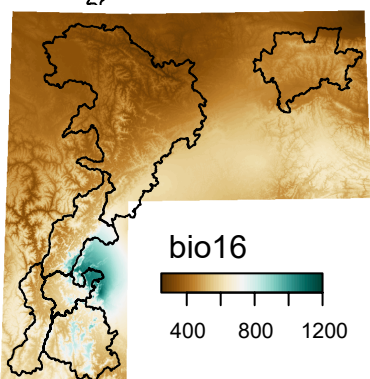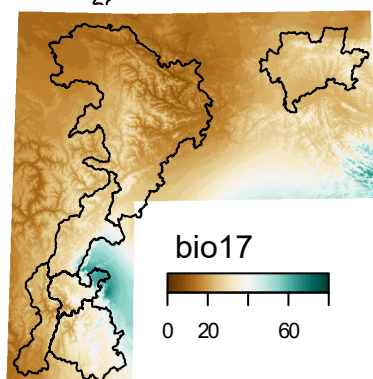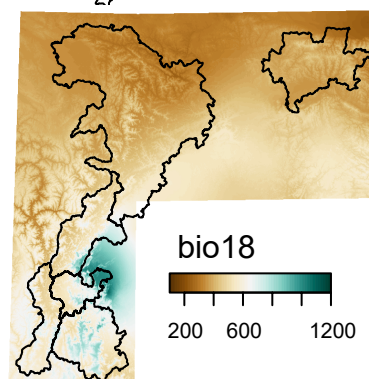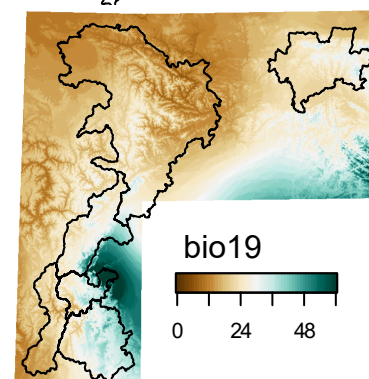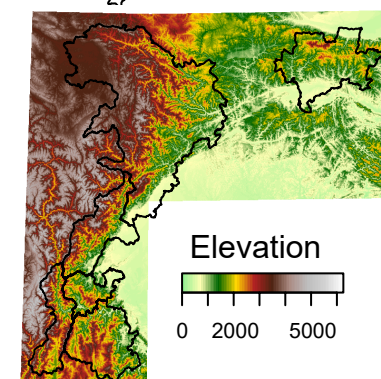

Supplement: pone.0189496.s007.pdf [file pone.0189496.s007.pdf]
